# Supplementary material for: Changes in Onset of Vegetation Growth on Svalbard, 2000–2020
Source: MDPI journal article supplement (doi:10.3390/rs14246346), 2022-12-15
Supplement: s1 [file s1]

### Supplementary Material

Table S1. Monthly and mean annual temperature (°C) for the two meteorological stations Svalbard Lufthavn and Ny-Ålesund. Data from Norwegian Centre for Climate Services (<https://seklima.met.no/observations/>), downloaded 28 November 2022.

#### Station SN99840 Svalbard Lufthavn

| Year | Jan.  | Feb.  | Mar.  | Apr.  | May  | Jun. | Jul. | Aug. | Sep. | Oct. | Nov.  | Dec.  | Annual |
|------|-------|-------|-------|-------|------|------|------|------|------|------|-------|-------|--------|
| 2000 | -8,5  | -11,1 | -14,7 | -12,7 | -4,4 | 2,1  | 6,0  | 5,1  | 2,1  | 1,4  | -3,7  | -9,7  | -4,0   |
| 2001 | -8,3  | -9,1  | -16,4 | -12,3 | -3,0 | 3,3  | 6,4  | 6,5  | 3,3  | -5,1 | -11,1 | -9,0  | -4,6   |
| 2002 | -12,6 | -13,5 | -18,1 | -6,1  | -3,4 | 3,7  | 7,0  | 7,5  | 0,1  | -3,0 | -5,6  | -7,5  | -4,3   |
| 2003 | -18,6 | -12,2 | -17,2 | -9,6  | -2,6 | 2,8  | 6,9  | 6,5  | 0,8  | -4,3 | -6,7  | -19,1 | -6,1   |
| 2004 | -17,0 | -17,4 | -7,8  | -4,2  | -1,7 | 3,1  | 7,7  | 5,8  | 1,5  | -3,5 | -11,7 | -6,6  | -4,3   |
| 2005 | -7,5  | -6,7  | -17,0 |       | -1,1 | 4,6  | 7,3  | 6,8  | -0,2 | -5,2 | -3,9  | -3,8  | -2,4   |
| 2006 | -2,7  | -9,8  | -13,2 | 0,1   | 0,9  | 4,8  | 7,5  | 6,6  | 1,7  | -5,5 | -4,1  | -6,3  | -1,7   |
| 2007 | -8,9  | -9,0  | -6,7  | -9,4  | -1,4 | 5,1  | 7,8  | 6,4  | 2,1  | -2,5 | -5,3  | -8,6  | -2,5   |
| 2008 | -7,5  | -8,9  | -14,7 | -10,5 | -1,9 | 3,4  | 6,2  | 5,0  | 3,3  | -5,7 | -8,6  | -8,0  | -4,0   |
| 2009 | -12,7 | -11,3 | -11,5 | -15,9 | -1,0 | 3,0  | 7,7  | 6,3  | 1,7  | -3,6 | -1,9  | -5,5  | -3,7   |
| 2010 | -7,2  | -10,3 | -15,8 | -7,7  | 0,0  | 3,5  | 6,6  | 4,8  | 2,0  | -2,9 | -11,0 | -11,6 | -4,1   |
| 2011 | -15,2 | -12,7 | -12,7 | -5,8  | -1,6 | 4,8  | 6,9  | 6,9  | 4,4  | -2,6 | -6,0  | -6,6  | -3,4   |
| 2012 | -3,4  | -5,6  | -5,3  | -9,2  | -2,4 | 3,9  | 6,6  | 5,7  | 3,0  | -2,7 | -6,4  | -7,9  | -2,0   |
| 2013 | -8,3  | -10,8 | -14,3 | -9,3  | -1,5 | 4,4  | 7,4  | 7,2  | 3,7  | -4,7 | -8,0  | -8,1  | -3,5   |
| 2014 | -4,1  | -1,7  | -8,6  | -9,7  | -2,0 | 3,8  | 7,2  | 6,4  | 1,6  | -1,9 | -6,4  | -9,6  | -2,1   |
| 2015 | -7,3  | -13,9 | -6,8  | -5,3  | -2,2 | 4,6  | 8,1  | 7,3  | 2,8  | -1,8 | -3,4  | -6,0  | -2,0   |
| 2016 | -3,8  | -5,6  | -6,9  | -6,2  | 1,4  | 5,0  | 9,0  | 5,8  | 4,1  | 3,2  | -0,7  | -6,0  | -0,1   |
| 2017 | -10,3 | -6,9  | -11,6 | -8,3  | -3,9 | 4,6  | 6,9  | 6,1  | 4,9  | 0,5  | -3,6  | -4,9  | -2,2   |
| 2018 | -5,5  | -5,4  | -12,7 | -8,4  | 1,8  | 4,0  | 7,2  | 6,8  | 1,7  | -1,4 | -3,8  | -5,8  | -1,8   |
| 2019 | -10,3 | -11,1 | -12,6 | -3,9  | -2,3 | 4,8  | 8,4  | 6,2  | 2,6  | -4,6 | -7,2  | -10,8 | -3,4   |
| 2020 | -13,4 | -15,5 | -16,2 | -8,9  | 0,1  | 4,5  | 9,8  | 7,2  | 3,2  | -2,2 | -2,9  | -7,0  | -3,4   |
| Mean | -9,2  | -9,9  | -12,4 | -8,2  | -1,5 | 4,0  | 7,4  | 6,3  | 2,4  | -2,8 | -5,8  | -8,0  | -3,1   |

#### Station SN99910 Ny-Ålesund

| Year | Jan.  | Feb.  | Mar.  | Apr.  | May  | Jun. | Jul. | Aug. | Sep. | Oct. | Nov.  | Dec.  | Annual |
|------|-------|-------|-------|-------|------|------|------|------|------|------|-------|-------|--------|
| 2000 | -8,3  | -9,8  | -13,5 | -11,6 | -4,2 | 0,9  | 4,6  | 3,4  | 1,0  | 0,7  | -3,9  | -10,5 | -4,3   |
| 2001 | -8,2  | -8,3  | -14,2 | -11,1 | -3,4 | 2,4  | 5,4  | 4,6  | 2,2  | -5,4 | -11,4 | -8,4  | -4,7   |
| 2002 | -11,7 | -12,4 | -14,5 | -7,1  | -3,9 | 3,0  | 5,8  | 5,5  | -0,9 | -3,3 | -5,4  | -6,9  | -4,3   |
| 2003 | -16,4 | -11,4 | -16,3 | -9,7  | -3,1 | 2,2  | 5,9  | 5,3  | -0,2 | -3,7 | -6,5  | -17,0 | -5,9   |
| 2004 | -15,9 | -16,1 | -7,1  | -3,2  | -1,8 | 2,2  | 6,7  | 4,8  | 0,0  | -4,0 | -11,5 | -7,7  | -4,5   |
| 2005 | -7,4  | -7,5  | -14,4 | -8,5  | -1,8 | 3,8  | 5,4  | 5,3  | -1,1 | -6,3 | -4,0  | -3,9  | -3,4   |
| 2006 | -3,3  | -10,8 | -13,2 | -1,0  | 0,2  | 4,2  | 6,1  | 4,7  | -0,1 | -6,6 | -5,4  | -7,2  | -2,7   |
| 2007 | -9,1  | -8,8  | -8,2  | -11,4 | -3,0 | 2,3  | 6,6  | 4,3  | 0,0  | -3,4 | -5,7  | -8,8  | -3,8   |
| 2008 | -7,7  | -8,8  | -14,3 | -9,5  | -2,4 | 2,6  | 5,2  | 3,4  | 2,2  | -6,2 | -9,0  | -8,1  | -4,4   |
| 2009 | -11,8 | -10,5 | -11,9 | -15,6 | -1,8 | 1,6  | 6,0  | 4,4  | 1,2  | -4,3 | -3,3  | -6,0  | -4,3   |
| 2010 | -8,0  | -10,6 | -13,9 | -7,7  | -0,3 | 2,8  | 5,7  | 3,4  | 1,2  | -3,4 | -11,6 | -10,9 | -4,4   |
| 2011 | -13,9 | -10,7 | -12,8 | -5,3  | -2,0 | 3,8  | 6,3  | 5,7  | 3,0  | -3,5 | -6,7  | -6,9  | -3,6   |
| 2012 | -3,6  | -6,8  | -5,7  | -9,8  | -2,1 | 3,7  | 5,8  | 4,6  | 2,1  | -3,3 | -7,4  | -8,0  | -2,5   |
| 2013 | -7,9  | -10,8 | -13,2 | -9,2  | -1,8 | 3,2  | 5,6  | 5,2  | 3,3  | -6,0 | -9,1  | -8,7  | -4,1   |
| 2014 | -4,7  | -2,7  | -9,2  | -10,4 | -3,4 | 2,0  | 5,3  | 4,2  | 0,3  | -2,3 | -7,6  | -9,1  | -3,1   |
| 2015 | -6,1  | -13,8 | -6,6  | -5,8  | -2,1 | 3,8  | 6,6  | 5,8  | 1,6  | -2,1 | -4,3  | -7,0  | -2,5   |
| 2016 | -4,8  | -6,9  | -7,5  | -6,9  | 1,0  | 3,8  | 6,9  | 4,3  | 2,8  | 1,9  | -1,7  | -6,7  | -1,2   |
| 2017 | -11,8 | -7,8  | -12,4 | -8,4  | -4,3 | 3,4  | 6,1  | 4,5  | 4,9  | 0,5  | -4,3  | -5,3  | -2,9   |
| 2018 | -4,9  | -4,7  | -11,8 | -8,1  | 1,6  | 3,4  | 6,2  | 5,6  | 0,5  | -1,6 | -4,1  | -7,0  | -2,1   |
| 2019 | -9,2  | -11,2 | -11,7 | -4,0  | -2,1 | 3,3  | 7,3  | 4,7  | 2,7  | -4,2 | -6,6  | -9,8  | -3,4   |
| 2020 | -12,3 | -15,5 | -17,0 | -9,0  | -0,3 | 3,7  | 8,1  | 6,2  | 2,5  | -2,0 | -3,5  | -7,5  | -3,9   |
| Mean | -8,9  | -9,8  | -11,9 | -8,3  | -2,0 | 3,0  | 6,1  | 4,8  | 1,4  | -3,3 | -6,3  | -8,2  | -3,6   |
